# Supplementary material for: Sublethal enteroviral infection exacerbates disease progression in an ALS mouse model
Source: PubMed Central journal article supplement (PMC8753920; doi:10.1186/s12974-022-02380-7), 2022-01-12

# Additional file 1: Fig. S1

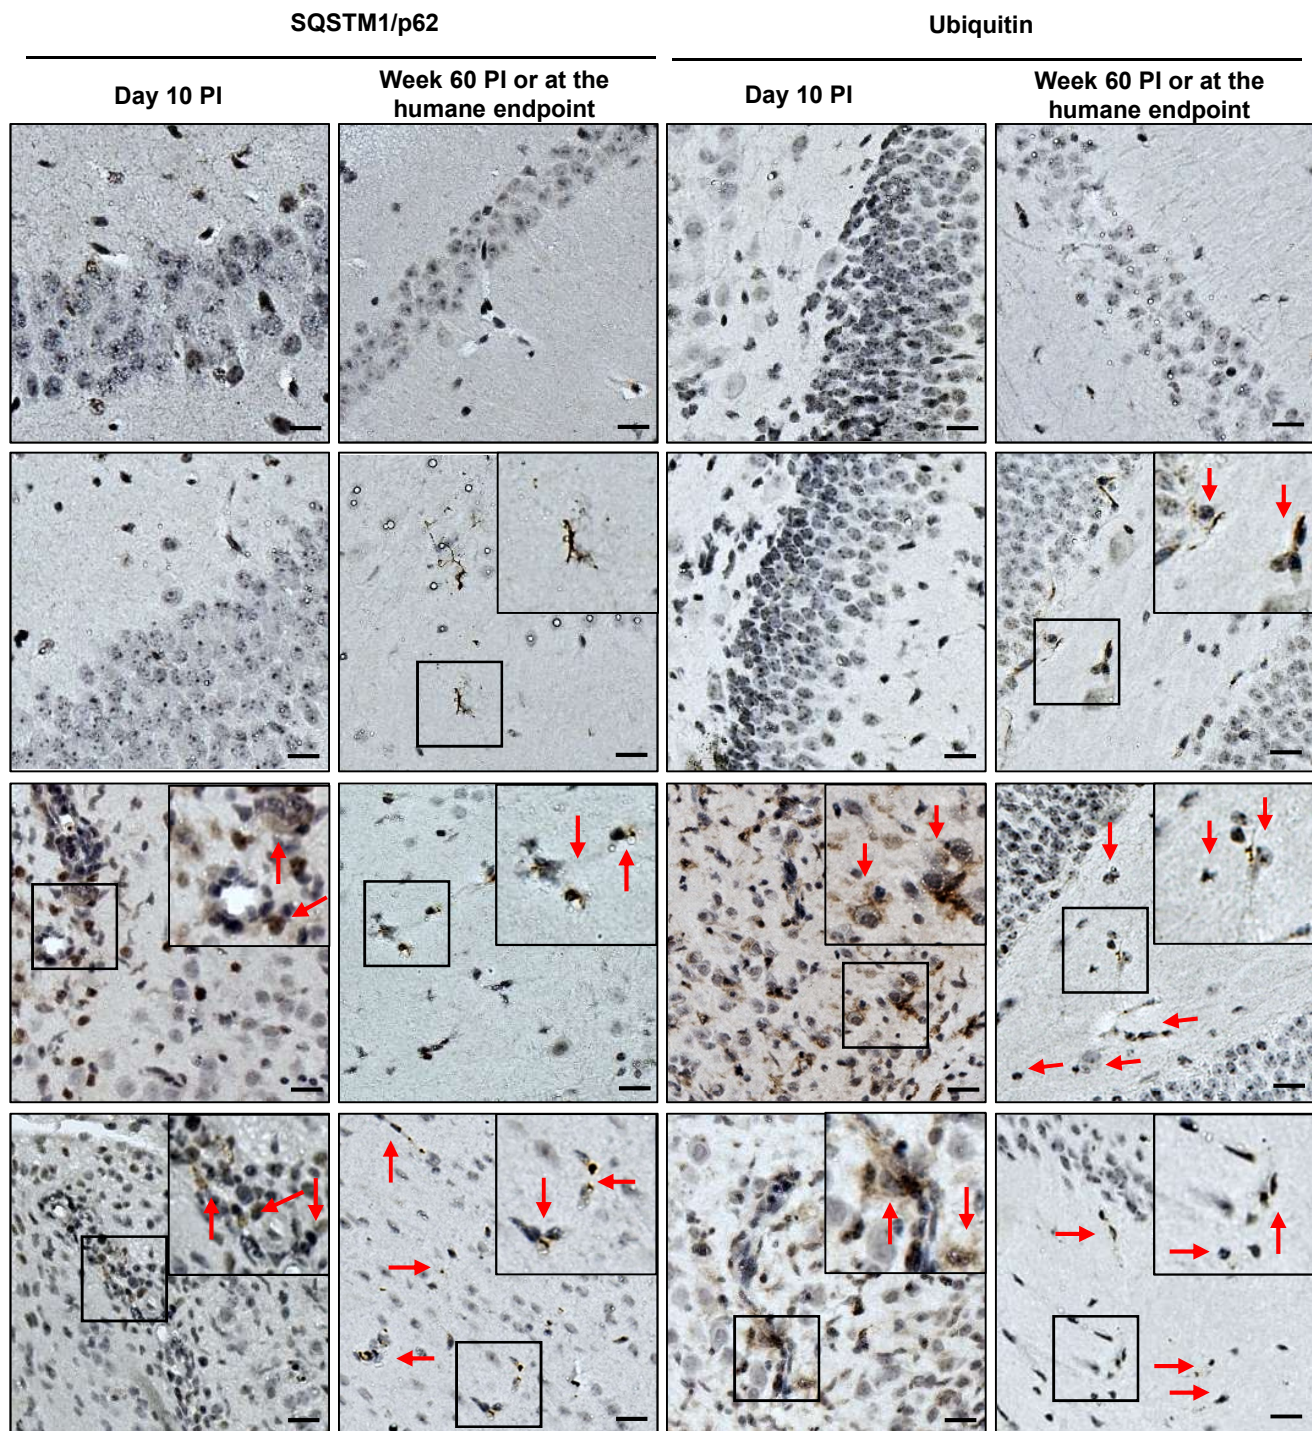

Supplement: 12974_2022_2380_MOESM1_ESM.pdf [file 12974_2022_2380_MOESM1_ESM.pdf]
