# Supplementary material for: Sublethal enteroviral infection exacerbates disease progression in an ALS mouse model
Source: PubMed Central journal article supplement (PMC8753920; doi:10.1186/s12974-022-02380-7), 2022-01-12

# Additional file 2: Fig. S2

**A** Day 10 PI

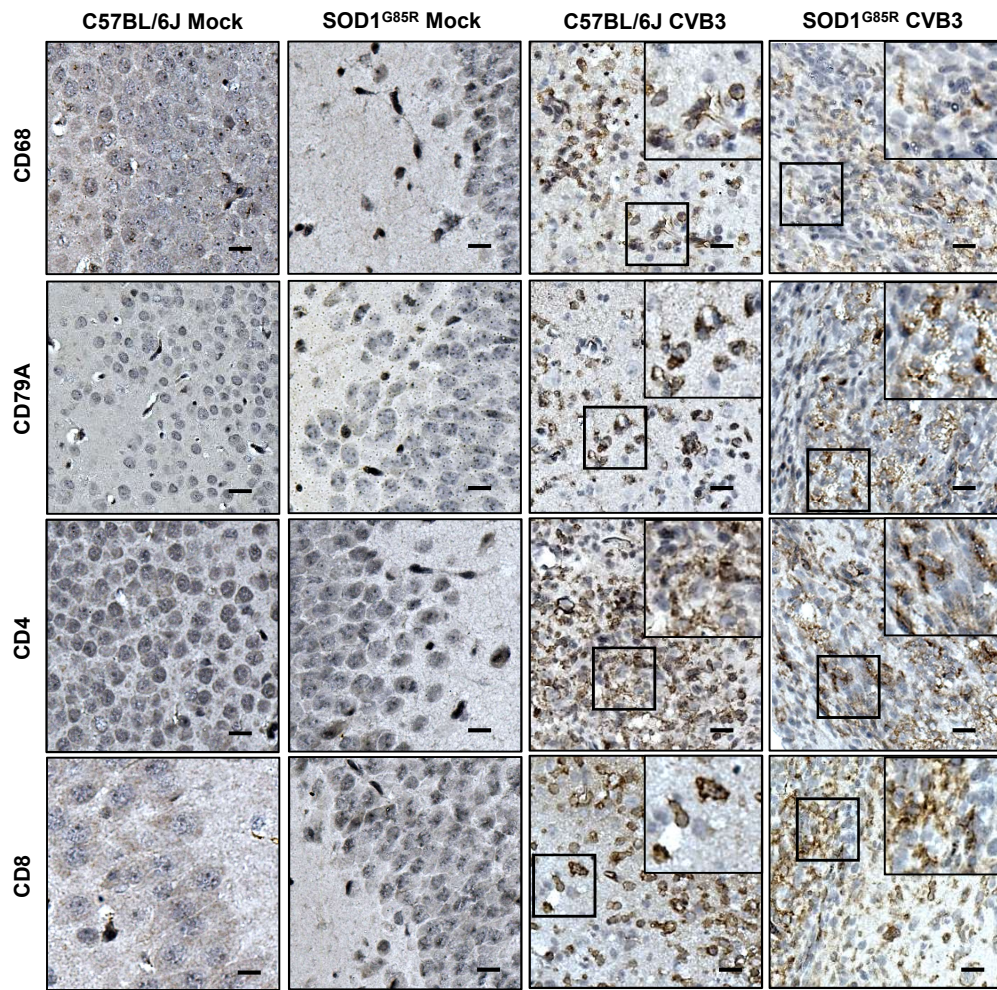

**B** Week 60 PI or at the humane endpoint

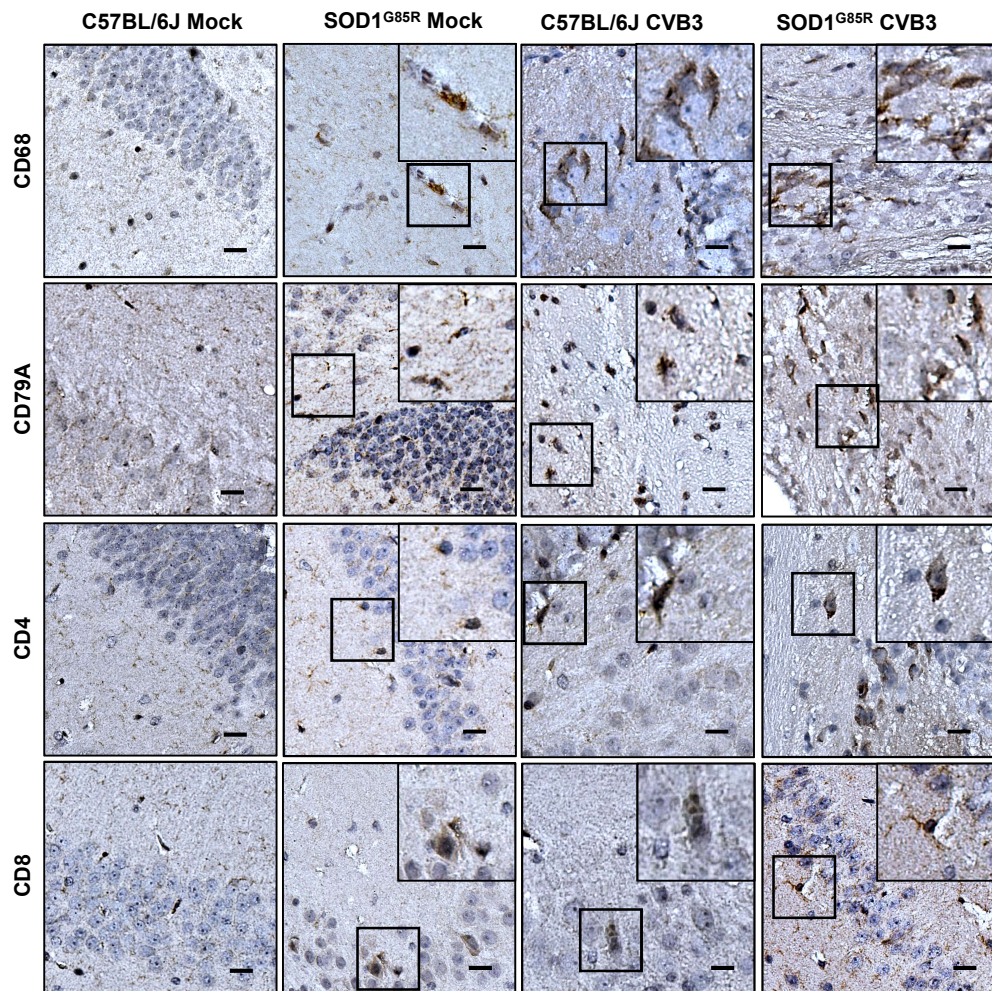

Supplement: 12974_2022_2380_MOESM2_ESM.pdf [file 12974_2022_2380_MOESM2_ESM.pdf]
